# Supplementary material for: Diverse ancestry whole-genome sequencing association study identifies TBX5 and PTK7 as susceptibility genes for posterior urethral valves
Source: eLife. 2022 Sep 20;11:e74777. doi: 10.7554/eLife.74777 (PMC9512401; doi:10.7554/eLife.74777)
Supplement: Figure 6—source data 1. — The lead variants at the top four loci with p<5 × 10–7 are shown. OR, odds ratio; CI, 95% confidence interval. [file elife-74777-fig6-data1.xlsx]

## Sheet: Sheet1
Lead variant	Effect Allele	Diverse ancestry	European	Diverse ancestry	European
		P value	P value	OR (95% CI)	OR (95% CI)
rs10774740	T	7.81x10-12	7.03x10-8	0.40 (0.31-0.52)	0.42 (0.10-0.73)
rs144171242	G	2.02x10-8	3.60x10-5	7.20 (4.08-12.70)	5.90 (2.88-12.11)
rs1471950716	A	1.45x10-7	6.24x10-5	3.88 (2.42-6.22)	4.44 (2.68-7.36)
rs199975325	G	2.52x10-7	1.57x10-5	5.68 (3.22-9.99)	4.43 (2.16-9.06)
