# Supplementary material for: Diverse ancestry whole-genome sequencing association study identifies TBX5 and PTK7 as susceptibility genes for posterior urethral valves
Source: eLife. 2022 Sep 20;11:e74777. doi: 10.7554/eLife.74777 (PMC9512401; doi:10.7554/eLife.74777)
Supplement: Figure 10—source data 1. — The burden of rare autosomal structural variants intersecting with each cis-regulatory element type was compared between 132 cases and 23,727 controls. cCRE, candidate cis-regulatory element; CNV, copy number variant; DEL, deletion; DUP, duplication; INV, inversion; dELS, distal enhancer-like signature; pELS, proximal enhancer-like signature; PLS, promoter-like signature; OR, odds ratio; CI, 95% confidence interval. [file elife-74777-fig10-data1.xlsx]

## Sheet: Sheet1
		CNV	DEL	DUP	INV
dELS	No of cases (%)	109 (82.6)	130 (98.5)	91 (68.9)	75 (56.8)
	No of controls (%)	18,546 (78.2)	22,743 (95.9)	13,727 (57.9)	10,291 (43.4)
	Fisher's exact P	0.25	0.18	0.01	2.0x10-3
	OR (CI)	1.32 (0.84-2.18)	2.81 (0.76-23.5)	1.62 (1.11-2.40)	1.72 (1.20-2.47)
pELS	No of cases (%)	95 (72.0)	88 (66.7)	39 (29.5)	57 (43.2)
	No of controls (%)	14,755 (62.2)	13,446 (56.7)	3,988 (16.8)	6,848 (28.9)
	Fisher's exact P	0.02	0.02	2.7x10-4	4.9x10-4
	OR (CI)	1.56 (1.06-2.35)	1.53 (1.05-2.25)	2.08 (1.39-3.05)	1.87 (1.30-2.68)
PLS	No of cases (%)	82 (62.1)	39 (29.5)	11 (8.3)	48 (36.4)
	No of controls (%)	12,382 (52.2)	6,243 (26.3)	1,557 (6.6)	5,862 (24.7)
	Fisher's exact P	0.02	0.43	0.38	3.2x10-3
	OR (CI)	1.50 (1.04-2.18)	1.17 (0.79-1.73)	1.29 (0.63-2.41)	1.74 (1.19-2.52)
CTCF-only	No of cases (%)	101 (76.5)	79 (59.8)	24 (18.2)	65 (49.2)
	No of controls (%)	16,247 (68.5)	12,124 (51.1)	3,368 (14.2)	7,512 (31.7)
	Fisher's exact P	0.05	0.05	0.21	3.1x10-5
	OR (CI)	1.50 (0.99-2.32)	1.43 (0.99-2.06)	1.34 (0.82-2.11)	2.09 (1.46-2.99)
DNase-H3K4me3	No of cases (%)	86 (65.2)	52 (39.3)	19 (14.4)	52 (39.4)
	No of controls (%)	13,567 (57.2)	7,298 (30.8)	1,976 (8.3)	6,397 (27.0)
	Fisher's exact P	0.08	0.04	0.02	2.2x10-3
	OR (CI)	1.40 (0.97-2.05)	1.46 (1.01-2.10)	1.85 (1.07-3.03)	1.76 (1.22-2.53)
