# Supplementary material for: Diverse ancestry whole-genome sequencing association study identifies TBX5 and PTK7 as susceptibility genes for posterior urethral valves
Source: eLife. 2022 Sep 20;11:e74777. doi: 10.7554/eLife.74777 (PMC9512401; doi:10.7554/eLife.74777)
Supplement: Table 2—source data 1. — The lead variants at the top four loci with p<5 × 10–7 were genotyped in an independent European cohort of 395 posterior urethral valves (PUV) cases and 4151 controls. p-Values in the replication cohort were calculated using a one-sided Cochran Armitage Trend test. OR, odds ratio; CI, 95% confidence interval. [file elife-74777-table2-data1.xlsx]

## Sheet: Sheet1
Locus	Lead variant	Effect Allele	Discovery	Replication	Discovery OR	Replication OR
			P value	P value	(95% CI)	(95% CI)
12q24.21	rs10774740	T	7.81x10-12	5.17x10-3	0.40 (0.31-0.52)	0.80 (0.68-0.93)
6p.21.1	rs144171242	G	2.02x10-8	7.21x10-3	7.20 (4.08-12.70)	2.18 (1.22-3.90)
10q11.21	rs1471950716	A	1.45x10-7	NA	3.88 (2.42-6.22)	NA
	rs137855548	G	1.46x10-6	0.55	3.94 (2.36-6.56)	0.84 (0.47-1.48)
14q21.1	rs199975325	G	2.52x10-7	0.6	5.68 (3.22-9.99)	1.20 (0.60-2.41)
